# Supplementary material for: Structure of a AAA+ unfoldase in the process of unfolding substrate
Source: PubMed Central journal article supplement (PMC5423775; doi:10.7554/elife.25754), 2017-04-08
Supplement: elife-25754-supp1.pdf [file elife-25754-supp1.pdf]

**Supplementary file 1.** Cryo-EM data acquisition, processing, and atomic model statistics.

| <b>Data Collection</b>                                | <b><math>\Delta</math>N-VAT</b> |
|-------------------------------------------------------|---------------------------------|
| Electron Microscope                                   | Tecnai F20                      |
| Camera                                                | K2 Summit                       |
| Voltage                                               | 200 kV                          |
| Nominal Magnification                                 | 25,000 $\times$                 |
| Calibrated physical pixel size                        | 1.45 Å                          |
| Total exposure                                        | 35 electrons/Å <sup>2</sup>     |
| Exposure rate                                         | 5 electrons/pixel/s             |
| Number of frames                                      | 30                              |
| Defocus range                                         | 1.7-2.9 $\mu$ m                 |
| <b>Image Processing</b>                               |                                 |
| Motion correction software                            | <i>alignparts lmbfgs</i>        |
| CTF estimation software                               | CTFFIND4                        |
| Particle selection software                           | Relion 1.4                      |
| Micrographs used                                      | 246                             |
| Particles selected                                    | 171,381                         |
| 3D map classification and refinement software         | cryoSPARC                       |
| Particles contributing to final map (stacked-rings)   | 75,205                          |
| Applied symmetry (stacked-rings)                      | C6                              |
| Applied B-factor (stacked-rings)                      | 199.5 Å <sup>2</sup>            |
| Global resolution (FSC = 0.143) (stacked-rings)       | 3.9 Å                           |
| Particles contributing to final map (substrate-bound) | 13,238                          |
| Applied symmetry (substrate-bound)                    | C1                              |
| Applied B-factor (substrate-bound)                    | 218.8 Å <sup>2</sup>            |
| Global resolution (FSC = 0.143) (substrate-bound)     | 4.8 Å                           |
| <b>Model Building</b>                                 |                                 |
| Modeling software                                     | <i>Coot, Phenix</i>             |
| Number of residues built                              | 3264                            |
| RMS (bonds)                                           | 0.0037                          |
| RMS (angles)                                          | 0.96                            |
| Ramachandran outliers                                 | 0.00 %                          |
| Ramachandran favoured                                 | 96.49 %                         |
| Clashscore                                            | 20.17                           |
| MolProbity score                                      | 2.59                            |
| EMRinger score                                        | 1.17                            |
